# Supplementary material
Source: MDPI journal article supplement (https://www.mdpi.com/2413-4155/4/4/43)
Supplement: s1 [file s1]

# Synthesis and structural characterization of an amorphous and photoluminescent mixed Eu/Zr coordination compound, a potential marker for gunshot residues

Ayla Roberta Borges Serra<sup>1</sup>, Thiago Rui Casagrande<sup>2</sup>, Juliana Fonseca de Lima<sup>3</sup>, Marcelo Firmino de Oliveira<sup>2</sup>, Severino Alves Júnior<sup>1</sup>, Marcos de Oliveira Junior<sup>4\*</sup>, Osvaldo Antonio Serra<sup>2\*</sup>

1. Fundamental Department of Chemistry, Federal University of Pernambuco, Recife, PE 50670-901, Brazil
2. Chemistry Department, University of São Paulo, Faculty of Philosophy, Sciences and Letters at Ribeirão Preto, Ribeirão Preto, SP, 14040-901, Brazil
3. Institute of Chemistry, Rio de Janeiro State University, Rio de Janeiro, RJ, 20550-900, Brazil
4. São Carlos Institute of Physics, University of São Paulo, PO Box 369, São Carlos 13566-590, SP, Brazil

TGA analysis for the compound  $[(\text{Eu}_2\text{Zr})(\text{btc})_3(\text{Hbtc})_{0.5}\cdot 6\text{H}_2\text{O}]$ .

$[(\text{Eu}_2\text{Zr})(\text{btc})_3(\text{Hbtc})_{0.5}\cdot 6\text{H}_2\text{O}]$

$152 \times 2 = 304$

$91.2 \times 1 = 91.2$

$\text{Btc} = 3 \times 207 = 621$

$\text{Hbtc} = (0.5) \times 208 = 104$

$6 \text{ H}_2\text{O} = 108$

Total = 1228

$\text{H}_2\text{O}$  molecules

$6 \times 18 = 108$

$108/1228 = 8.8\%$

(found 9%, calculated 8.8%)

To confirm the ratio of Zr/Eu

R 36%

$\text{Eu}_2\text{O}_3 + \text{ZrO}_2 = 352 + 127 = 479$

$479/1228 = 39\%$

## Elemental Analysis

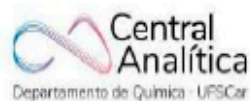

Rodovia Washington Luiz, km. 235  
Fone: (16) 3351-8077  
CEP 13.565-905 - São Carlos - SP - Brasil  
[www.central.dq.ufscar.br](http://www.central.dq.ufscar.br)  
e-mail: [central.dq@ufscar.br](mailto:central.dq@ufscar.br) ; [central.dq.ufscar@gmail.com](mailto:central.dq.ufscar@gmail.com)

*Fisons - EA1108*

Data de análise: 14/10/2022

| Cód_CA      | Massa (mg) | %C    | %H   | %N | %S |
|-------------|------------|-------|------|----|----|
| Ayla sample | 2,244      | 30.75 | 1.86 | 0  | 0  |

Micro balança: Sartorius Micro (XM-1000 P)  
Calibrada em: 22/03/2022 (Evagon - Jundiaí/SP)

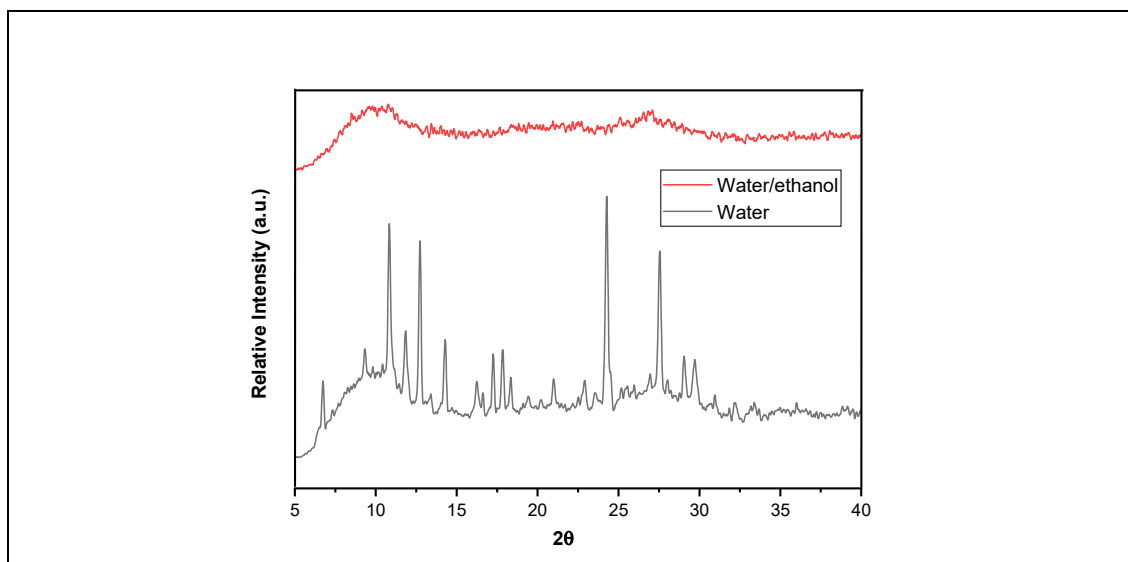

**Figure S1.** XRD pattern of luminescent compound  $[(\text{Eu}_2\text{Zr})(\text{btc})_3(\text{Hbtc})_{0.5} \cdot 6\text{H}_2\text{O}]$  synthesized in water/ethanol and in water.

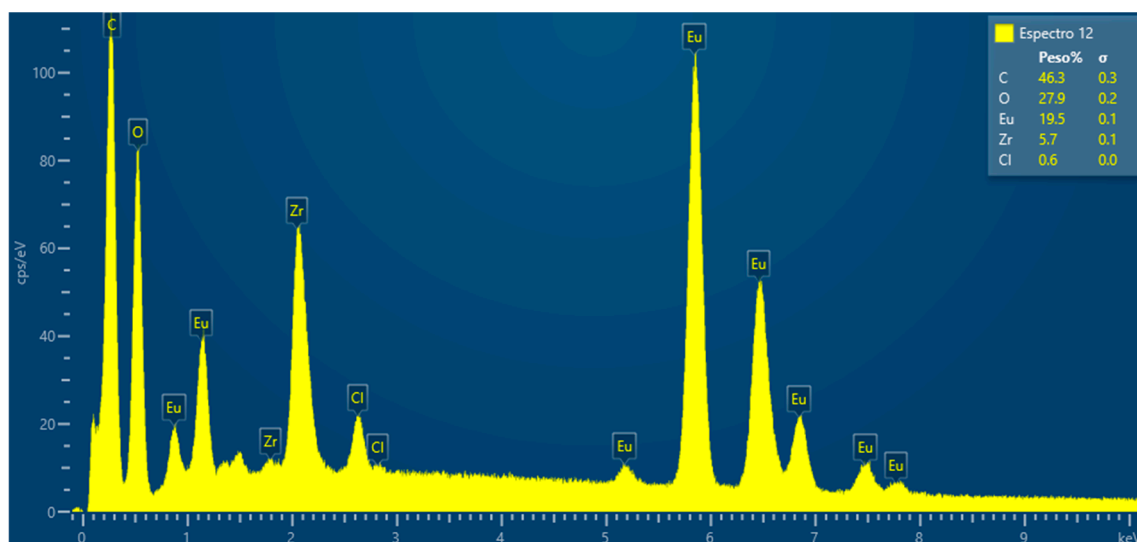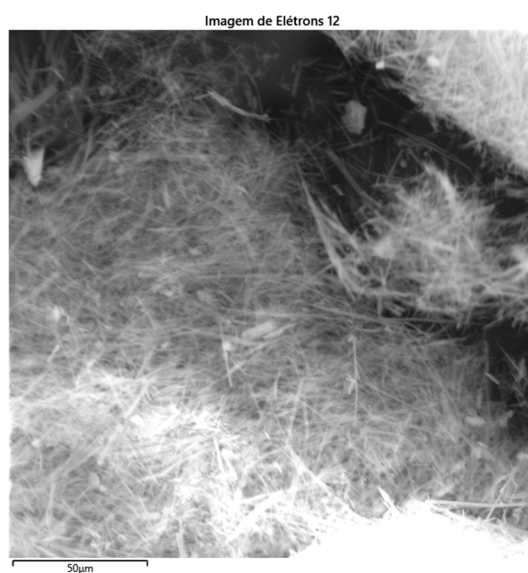

**Figure S2.** Chemical composition (EDS) analysis of  $[(\text{Eu}_2\text{Zr})(\text{btc})_3(\text{Hbtc})_{0.5} \cdot 6\text{H}_2\text{O}]$ .

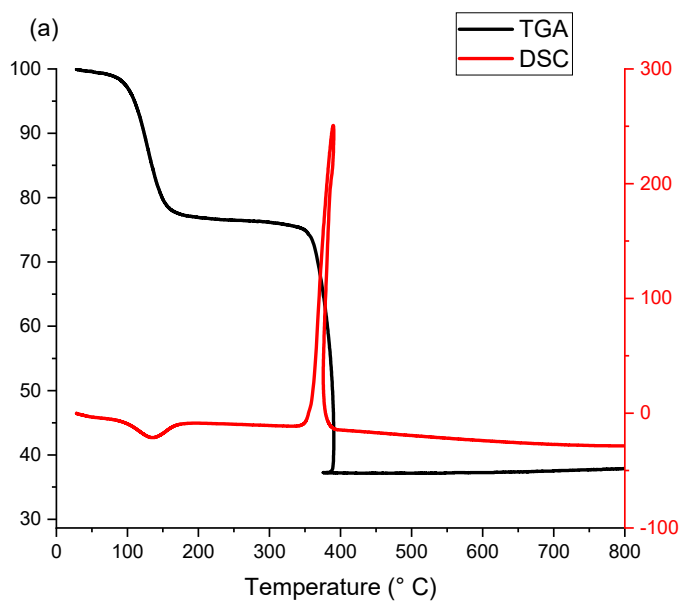

**Figure S3.** TGA/DSC analysis of Eu-BTC.

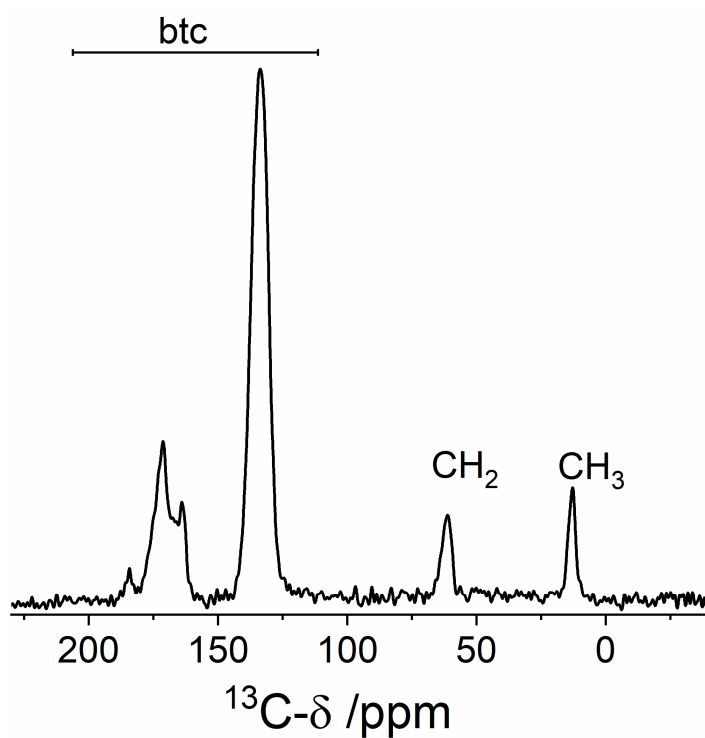

**Figure S4.**  $^{13}\text{C}\{^1\text{H}\}$  CPMAS spectrum of the compound  $[(\text{Eu}_2\text{Zr})(\text{btc})_3(\text{Hbtc})_{0.5}\cdot 6\text{H}_2\text{O}]$ .

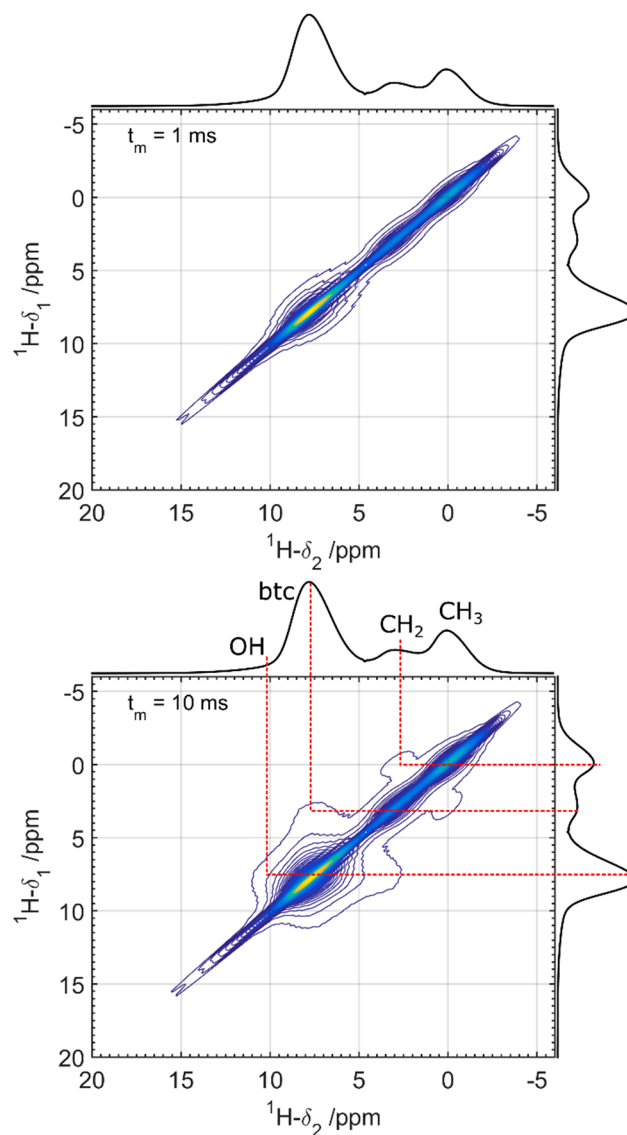

**Figure S5.** 2D  $^1\text{H}$ - $^1\text{H}$  EXSY spectra for  $[(\text{Eu}_2\text{Zr})(\text{btc})_3(\text{Hbtc})_{0.5}\cdot 6\text{H}_2\text{O}]$  measured at two mixing times, 1 ms and 10 ms, under 60 kHz MAS. The dashed lines indicate the presence of  $^1\text{H}$ - $^1\text{H}$  correlations for the longer mixing time. For short mixing times (1 ms), the spectrum reveals no exchange between distinct  $^1\text{H}$  species. For longer mixing times cross-peaks revealing exchange between  $^1\text{H}$  in  $\text{CH}_2$  and  $\text{CH}_3$  groups in ethanol become visible, while the same is true for the correlation between btc protons with  $\text{CH}_2$  and OH groups from the metal oxide cluster, revealing spatial proximity between these groups. Most probably, ethanol OH groups coordinate with btc  $\text{COO}^-$  ones by being hydrogen bound. The interaction of ethanol with btc species prevents the coordination with the metallic species, blocking the growth of the structure. Experimental details: experiments were performed at 60 kHz using a 1.4 s recycle delay and mixing times of 1 and 10 ms. A total of 512 points were collected in the indirect dimension with a time increment of 16.67  $\mu\text{s}$ , corresponding to a spectral width of 60 kHz.

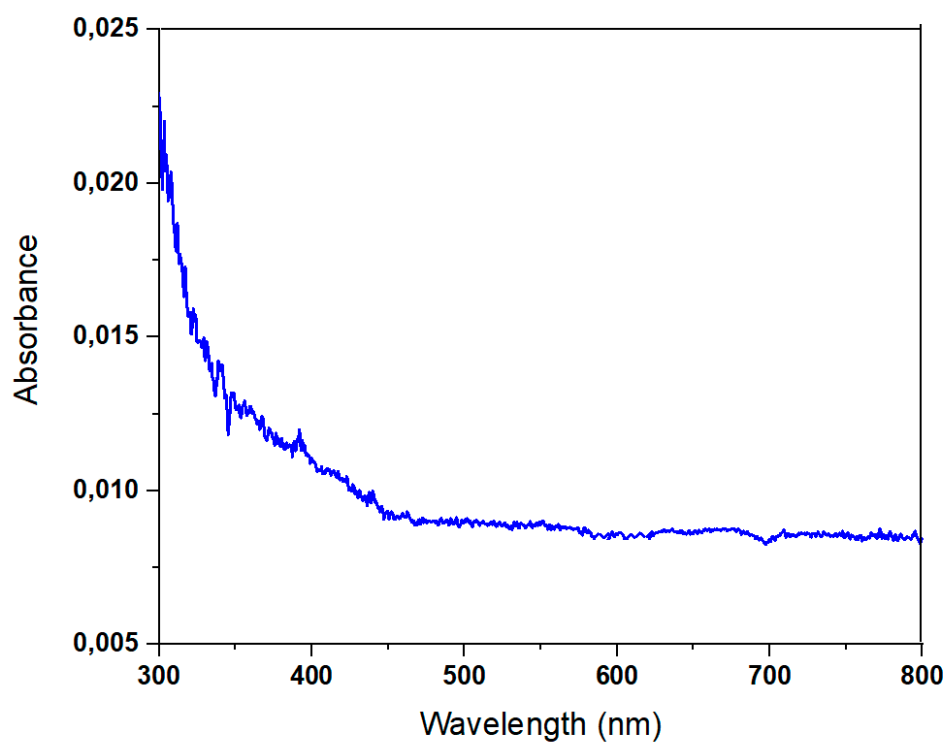

**Figure S6.** UV–VIS spectra of the luminescent compound  $[(\text{Eu}_2\text{Zr})(\text{btc})_3(\text{Hbtc})_{0.5}\cdot 6\text{H}_2\text{O}]$ .

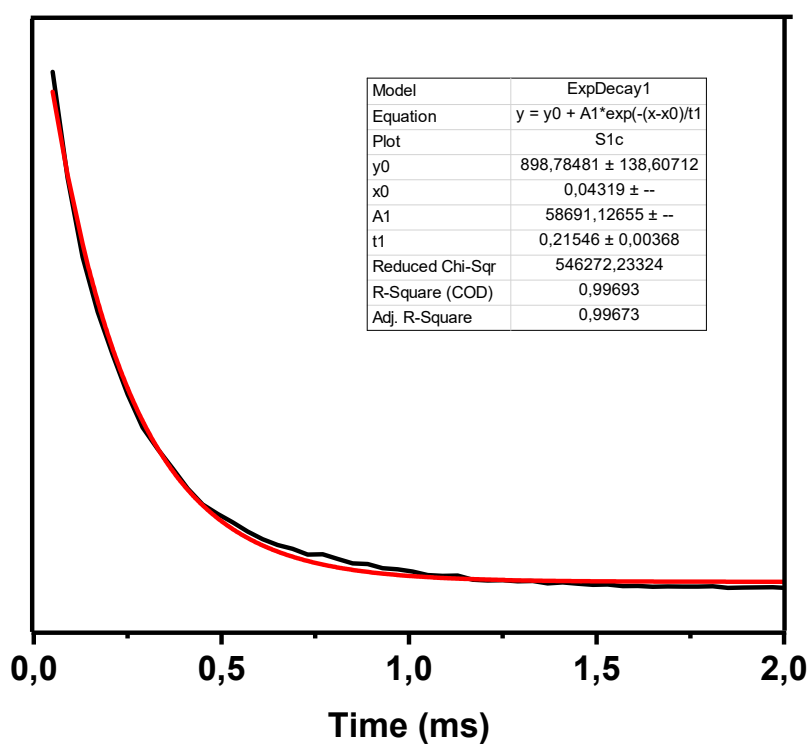

**Figure S7.** Exponential fitting of the decay curve of luminescent compound  $[(\text{Eu}_2\text{Zr})(\text{btc})_3(\text{Hbtc})_{0.5}\cdot 6\text{H}_2\text{O}]$ .
